# Supplementary material for: Development and validation of a bioanalytical HPLC method for simultaneous estimation of cinnamaldehyde and cinnamic acid in rat plasma: application for pharmacokinetic studies
Source: Royal Society of Chemistry journal article supplement (doi:10.1039/c9nj03183a), 2020-01-01
Supplement: c9nj03183a1.pdf [file c9nj03183a1.pdf]

Electronic Supplementary Material (ESI) for New Journal of Chemistry. This journal is © The Royal Society of Chemistry and the Centre National de la Recherche Scientifique 2019

## SUPPORTING INFORMATION

### Development and validation of bioanalytical HPLC method for simultaneous estimation of cinnamaldehyde and cinnamic acid in rat plasma: Application for pharmacokinetic studies

Varsha Shetty<sup>a</sup>, Bothiraja Chellampillai<sup>b</sup> and Ruchika Kaul-Ghanekar<sup>a\*</sup>

(Manuscript ID NJ-ART-06-2019-003183.R1)

#### ➤ Overlay of UV spectra for CNAD and CA

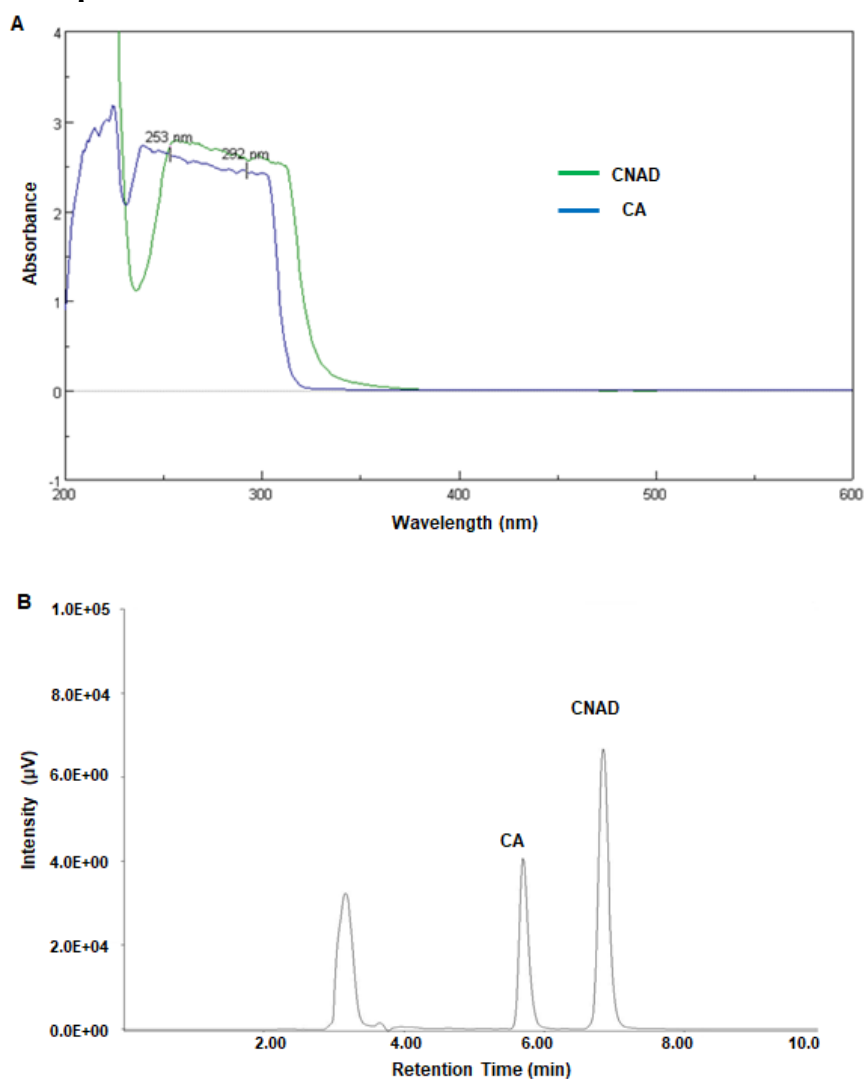

**Fig. S1.** (A) Overlay of UV spectra for CNAD (Green) and CA (Blue) (B) Representative HPLC chromatograms of rat plasma spiked with 0.01 µg/ml of CNAD and CA for system suitability. Chromatographic separation was achieved on C18 column using methanol: acetonitrile: 2% glacial acetic acid (20:50:30, v/v) as mobile phase at a flow rate of 0.8 ml/min and UV detection at 292 nm.

Studies reporting similar  $\lambda_{\max}$  of CNAD and/ or CA are given below for reference-

1. Yuan J, Bucher JR, Goehl TJ, Dieter MP, Jameson CW. Quantitation of cinnamaldehyde and cinnamic acid in blood by HPLC. *Journal of analytical toxicology*. 1992 Nov 1; 16(6):359-62.
2. Chen Y, Ma Y, Ma W. Pharmacokinetics and bioavailability of cinnamic acid after oral administration of *Ramulus Cinnamomi* in rats. *European journal of drug metabolism and pharmacokinetics*. 2009 Mar 1; 34(1):51-6.
3. Luo JP, Zhang ZS, Tian C, Li XM. Determination of cinnamaldehyde in Guizhi by HPLC. *Zhongguo Zhong yao za zhi= Zhongguo zhongyao zazhi= China journal of Chinese materia medica*. 2000 Sep; 25(9):544-5.
4. Huang HY, Kuo KL, Hsieh YZ. Determination of cinnamaldehyde, cinnamic acid, paeoniflorin, glycyrrhizin and [6]-gingerol in the traditional Chinese medicinal preparation Kuei-chih-tang by cyclodextrin-modified micellar electrokinetic chromatography. *Journal of Chromatography A*. 1997 May 30; 771(1-2):267-74.
5. HUA J, WU C. Determination of cinnamic acid, cinnamaldehyde and paeonol in Guizhifuling capsules by HPLC [J]. *Anhui Medical and Pharmaceutical Journal*. 2006; 1.

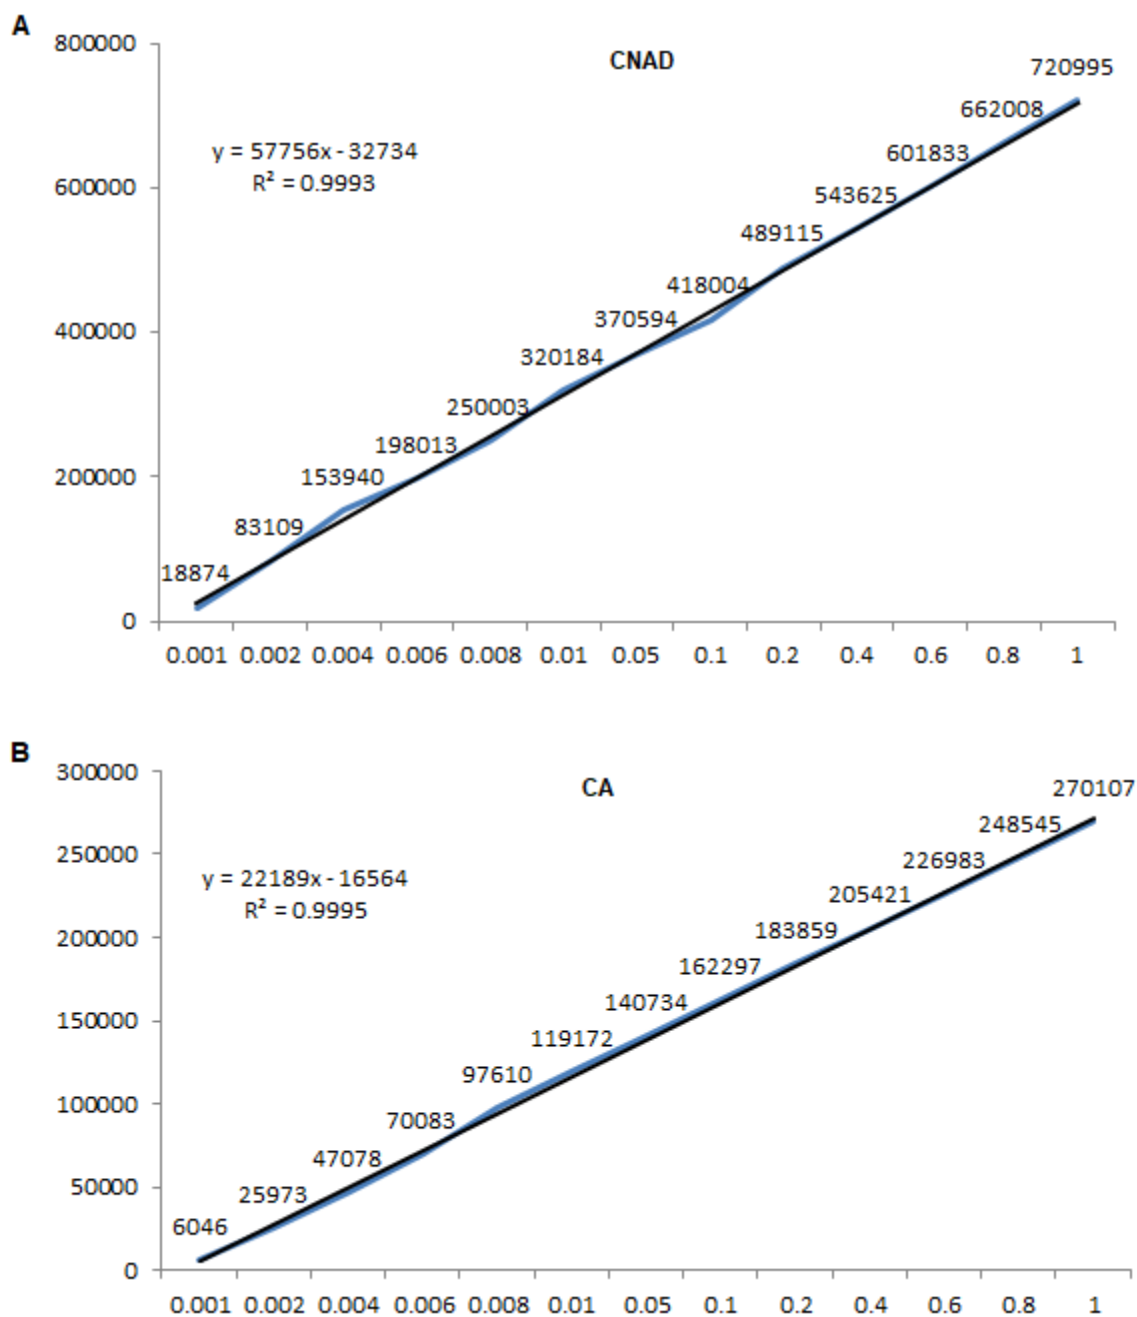

**Fig. S2. Representative Linearity Plots** for calibration range-0.001-1µg/ml **(A)** CNAD and **(B)** CA spiked plasma samples
